# Supplementary material for: Kinetics of evaporation of colloidal dispersion drops on inclined surfaces
Source: Royal Society of Chemistry journal article supplement (doi:10.1039/d3sm00375b), 2023-01-01
Supplement: d3sm00375b1.pdf [file d3sm00375b1.pdf]

## Supplementary Information

### Kinetics of Evaporation of Colloidal Dispersion Drops on Inclined Surfaces

Sankar Hariharan, Sumesh P Thampi<sup>‡</sup> and Madivala G. Basavaraj<sup>\*</sup>

*Polymer Engineering and Colloid Science Lab, Department of Chemical Engineering, Indian Institute of Technology Madras, Chennai 600036, Tamil Nadu, India*

Corresponding authors: <sup>‡</sup>sumesh@iitm.ac.in; <sup>\*</sup>basa@iitm.ac.in

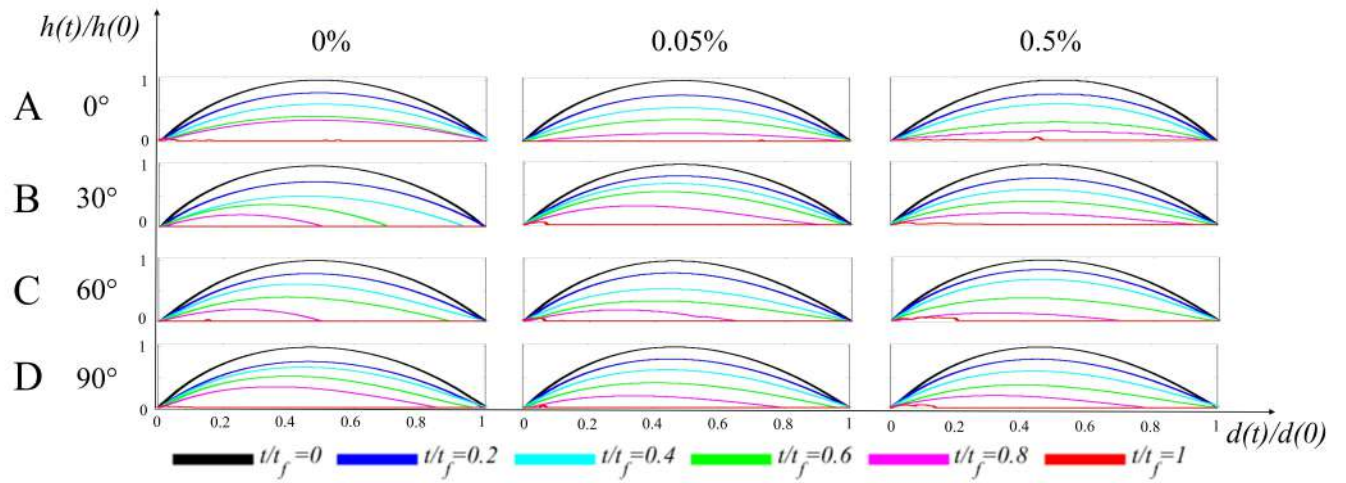

Fig. S1 The temporal evolution ( $t/t_f = 0, 0.2, 0.4, 0.6, 0.8$  and  $1.0$ ) of the profile of the drying  $2 \mu\text{L}$  drop for various inclinations and particle concentrations

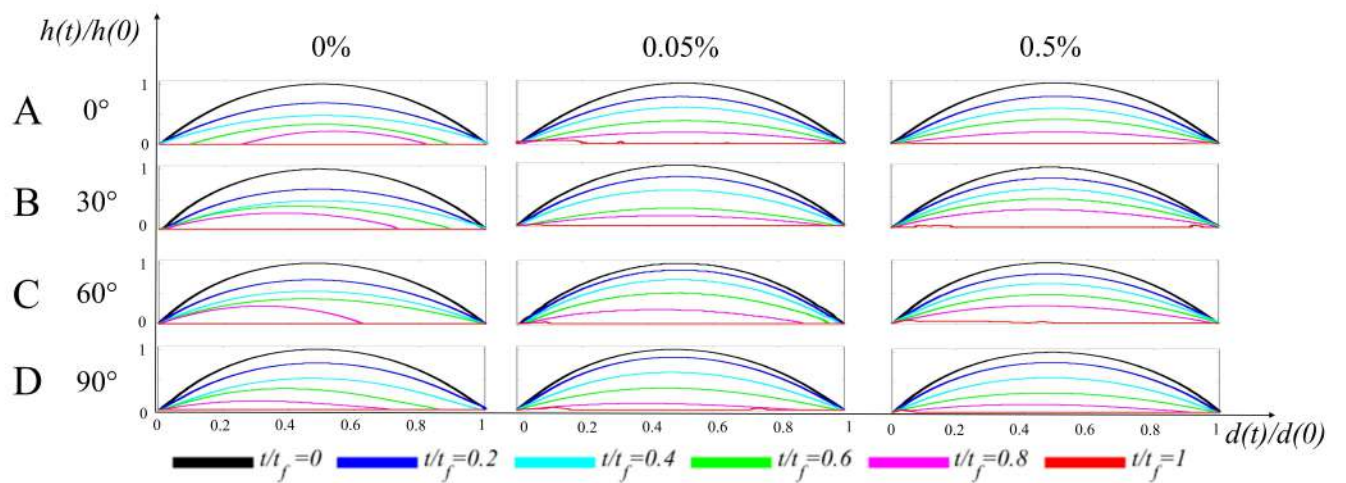

Fig. S2 The temporal evolution ( $t/t_f = 0, 0.2, 0.4, 0.6, 0.8$  and  $1.0$ ) of the profile of the drying  $1 \mu\text{L}$  drop for various inclinations and particle concentrations

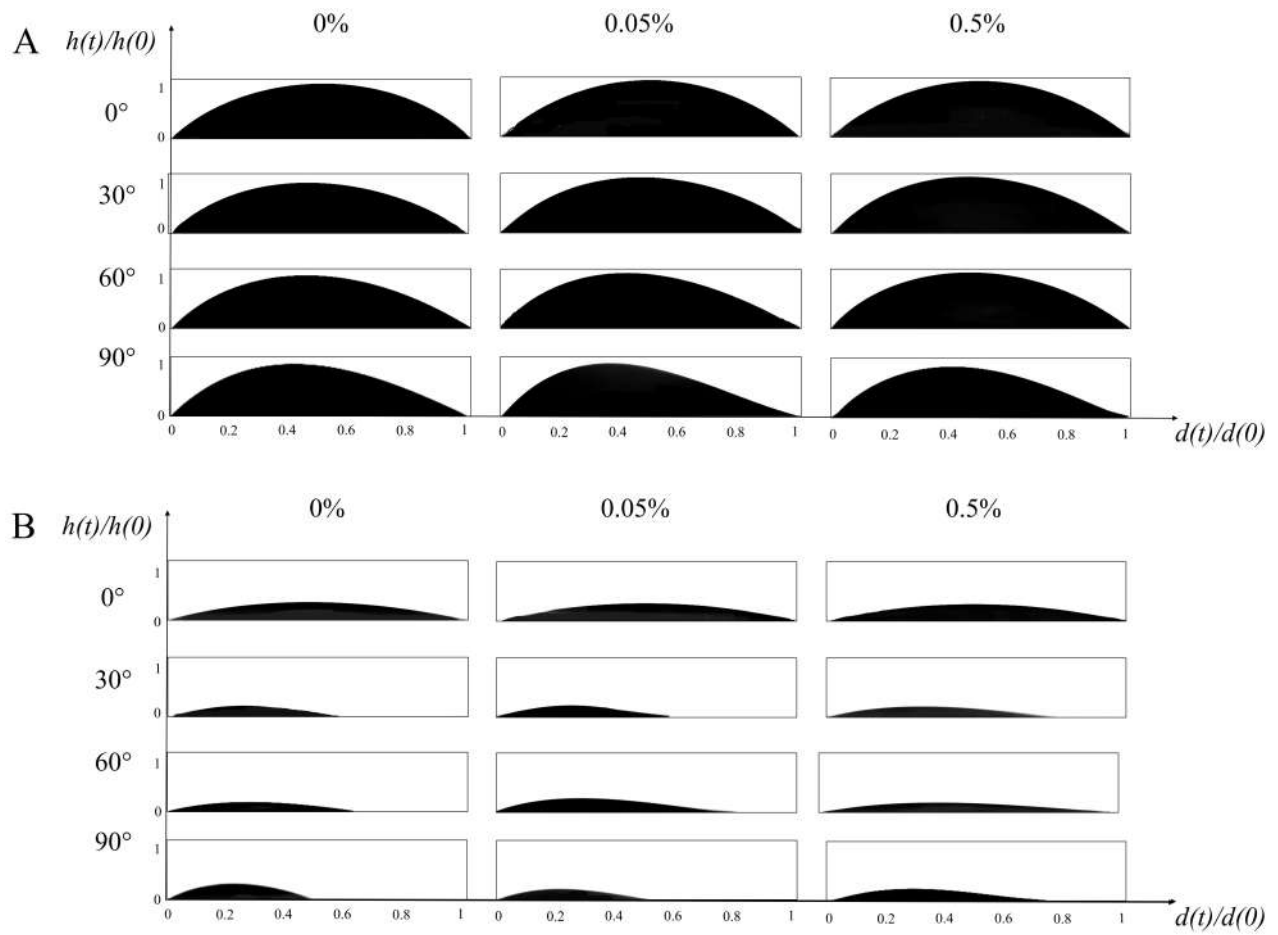

**Fig. S3** The side view of the drop of volume  $5 \mu\text{L}$  for various inclinations and particle concentrations obtained from the camera attached to the goniometer at (A)  $t/t_f = 0$  and (B)  $t/t_f = 0.8$

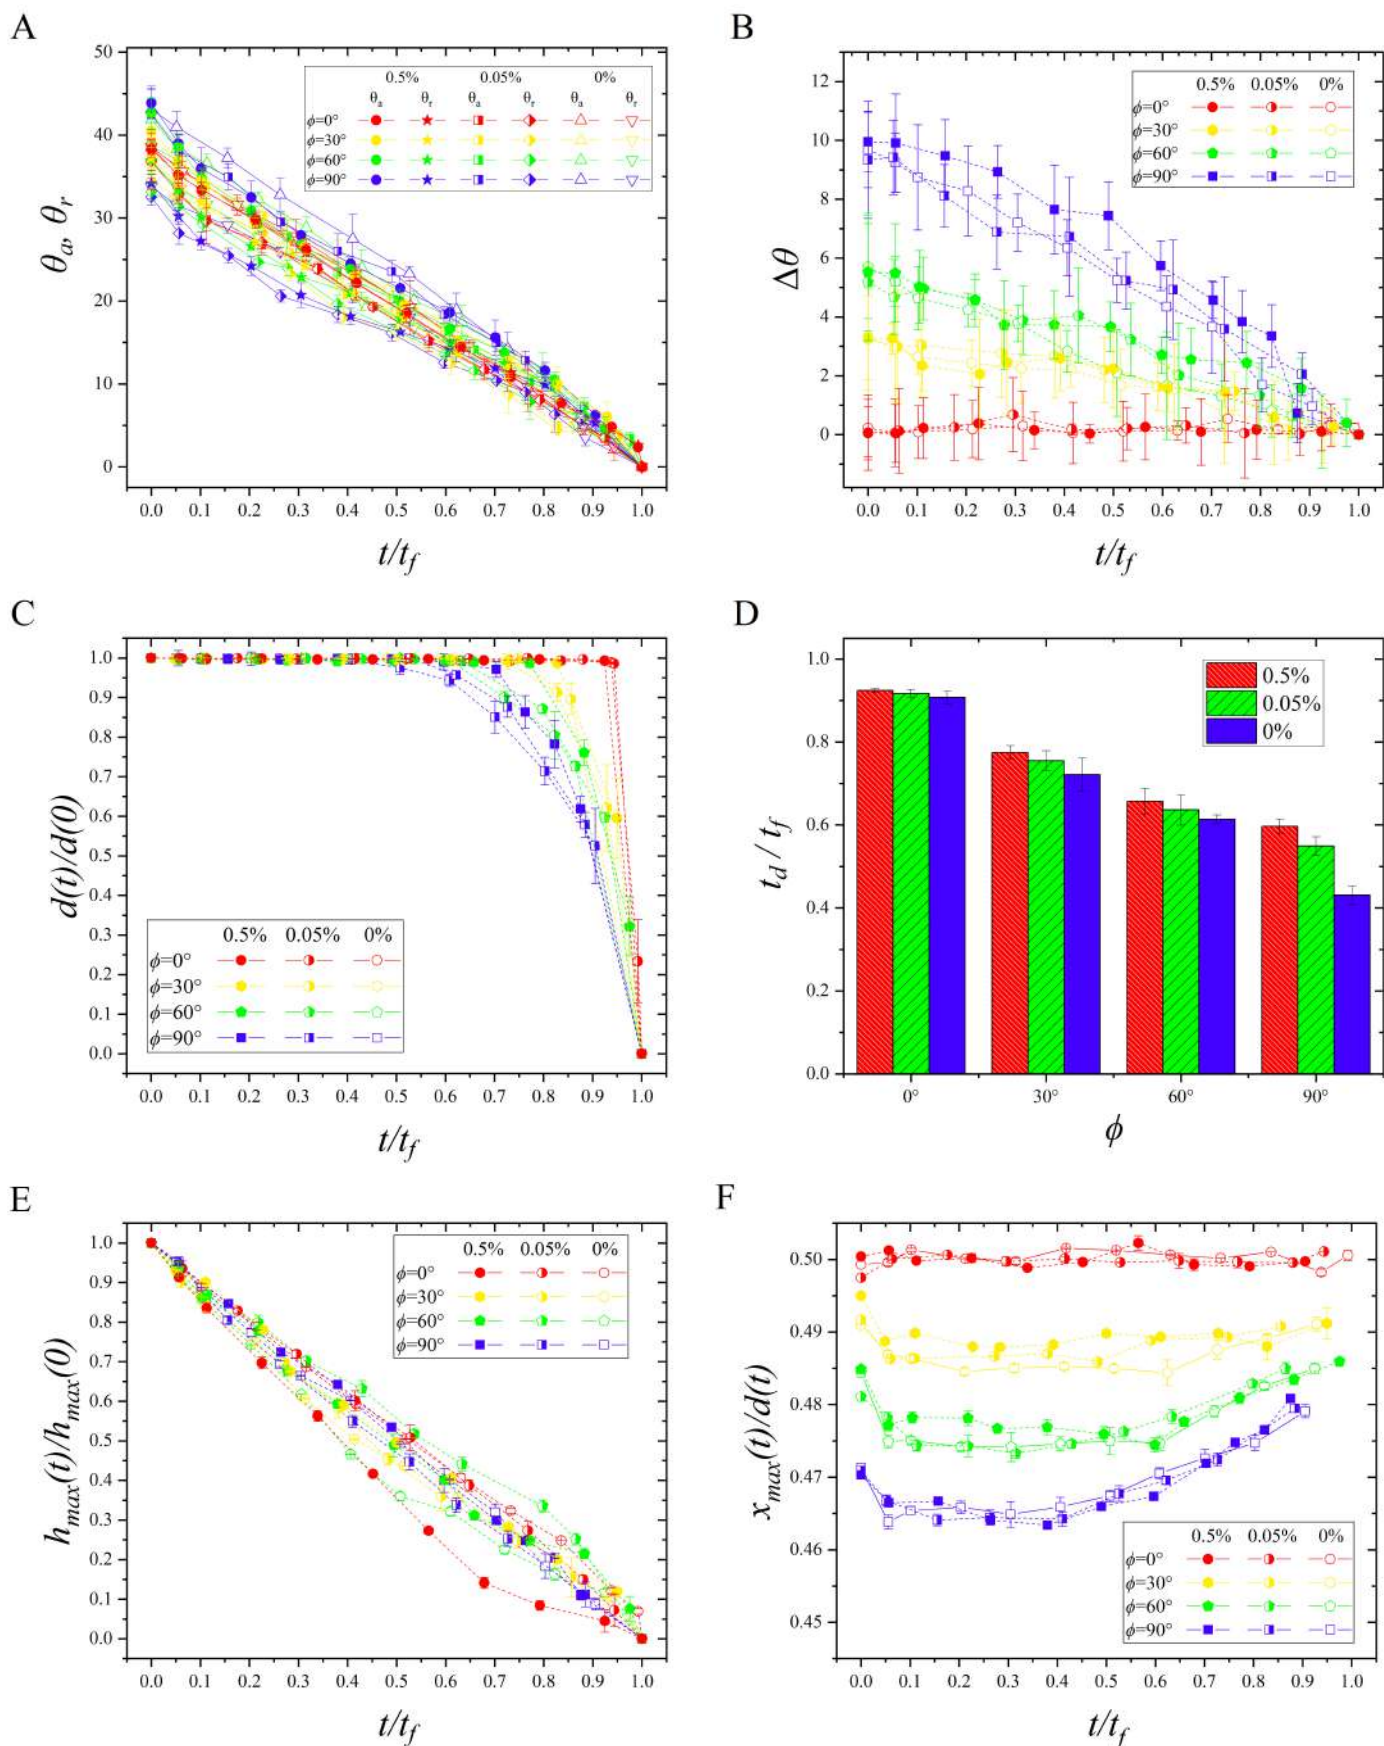

**Fig. S4** Temporal evolution of geometric parameters of an evaporating 2  $\mu\text{L}$  drop at various particle loading (0 wt.% to 0.5 wt.%) and at different substrate inclinations ( $\phi$ ): (A) Contact angles at the advancing side,  $\theta_a$  and the receding side,  $\theta_r$ ; (B) The difference between the contact angle at the advancing side and the receding side; (C) Diameter of the contact line; (D) Depinning time as a function of substrate inclination; (E) Maximum height of the drop; (F) Location of the maximum height measured from advancing side

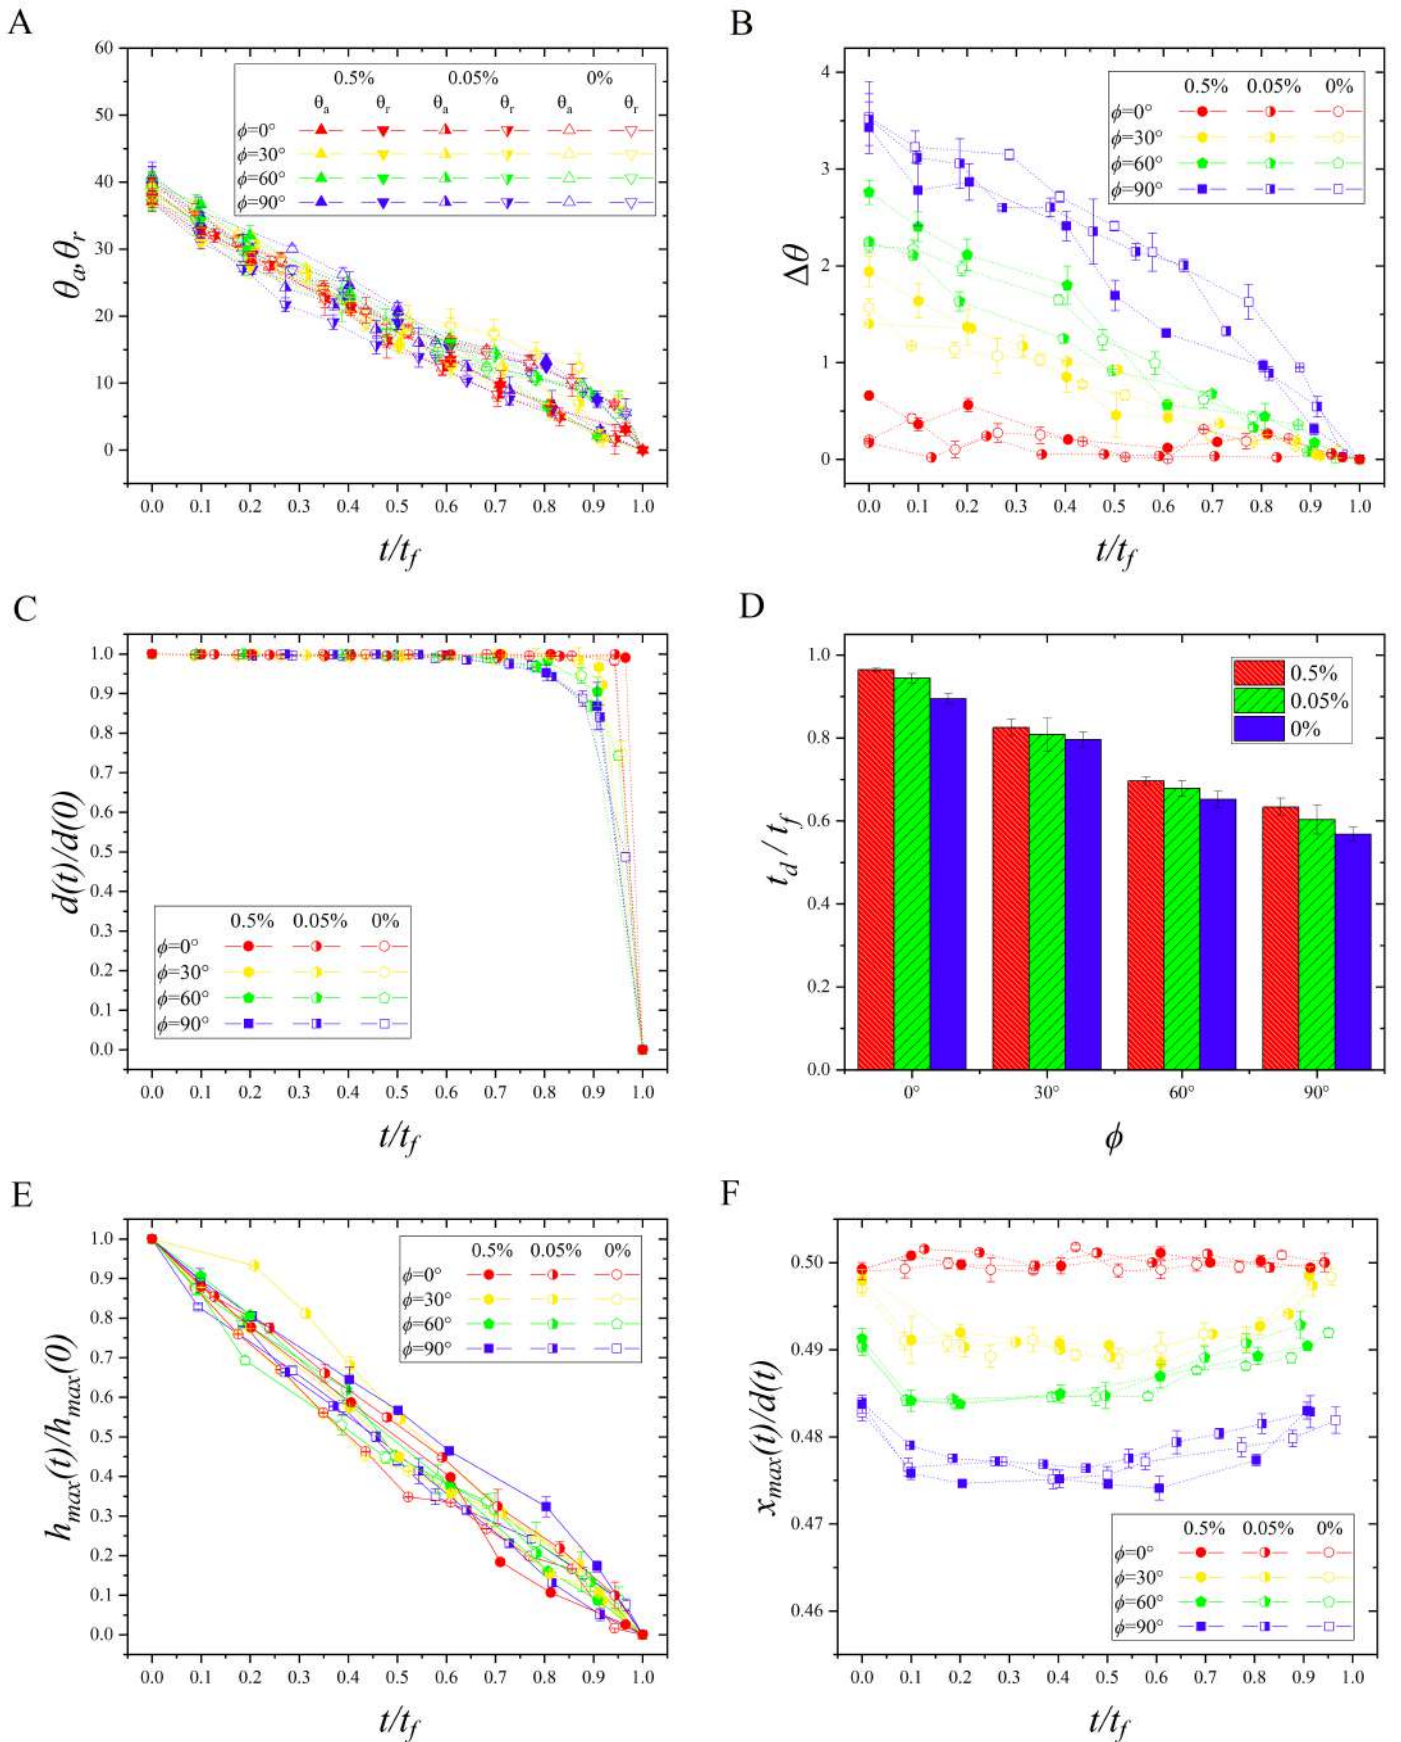

**Fig. S5** Temporal evolution of geometric parameters of an evaporating 1  $\mu\text{L}$  drop at various particle loading (0 wt.% to 0.5 wt.%) and at different substrate inclinations ( $\phi$ ): (A) Contact angles at the advancing side,  $\theta_a$  and the receding side,  $\theta_r$ ; (B) The difference between the contact angle at the advancing side and the receding side; (C) Diameter of the contact line; (D) Depinning time as a function of substrate inclination; (E) Maximum height of the drop; (F) Location of the maximum height measured from advancing side



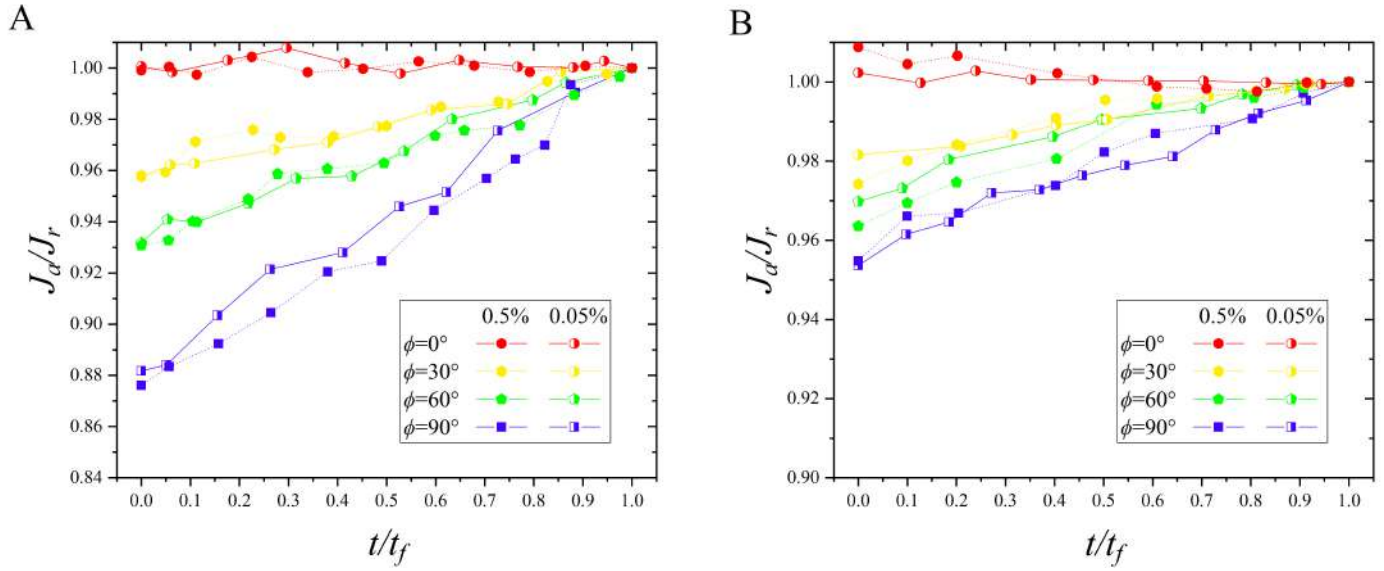

**Fig. S6** Ratio of the evaporative mass flux at the advancing side to that at the receding side as a function of time for (A) 2  $\mu\text{L}$  and (B) 1  $\mu\text{L}$  drops dried on substrates at different orientations and particle loading

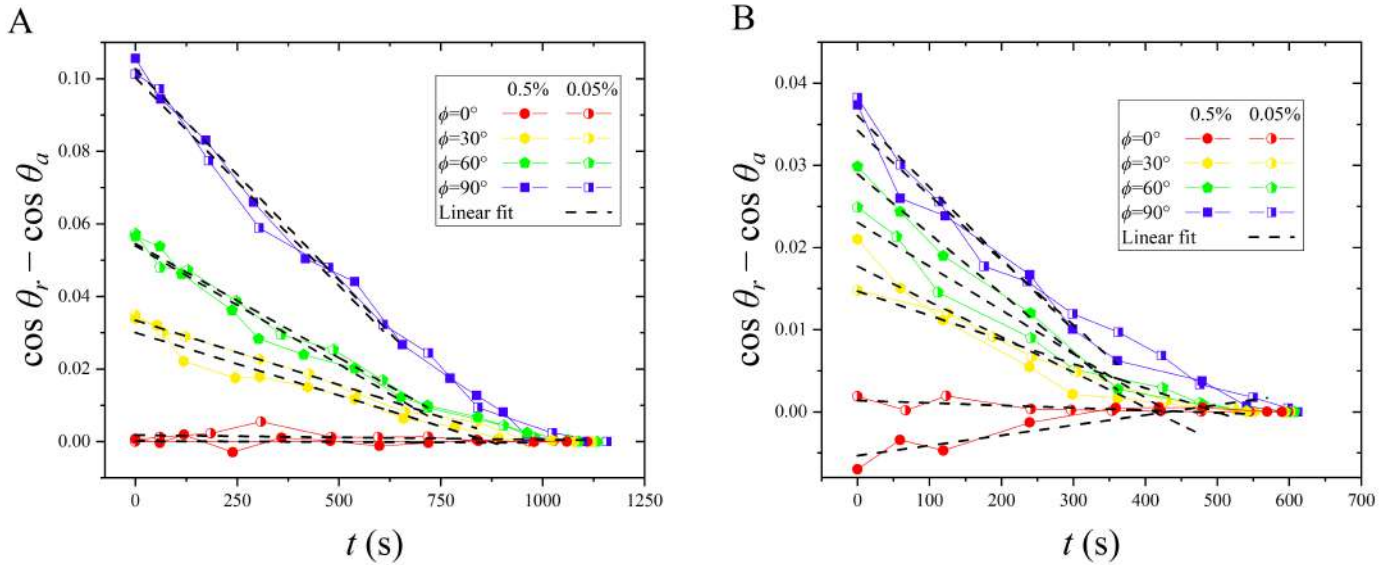

**Fig. S7** The difference in the cosine of the contact angle between the receding side and the advancing side as a function of time for (A) 2  $\mu\text{L}$  drop and (B) 1  $\mu\text{L}$  drop dried on substrates at different orientations and particle loading. The linear fit to Equation 7 (in the manuscript) is shown as dashed lines

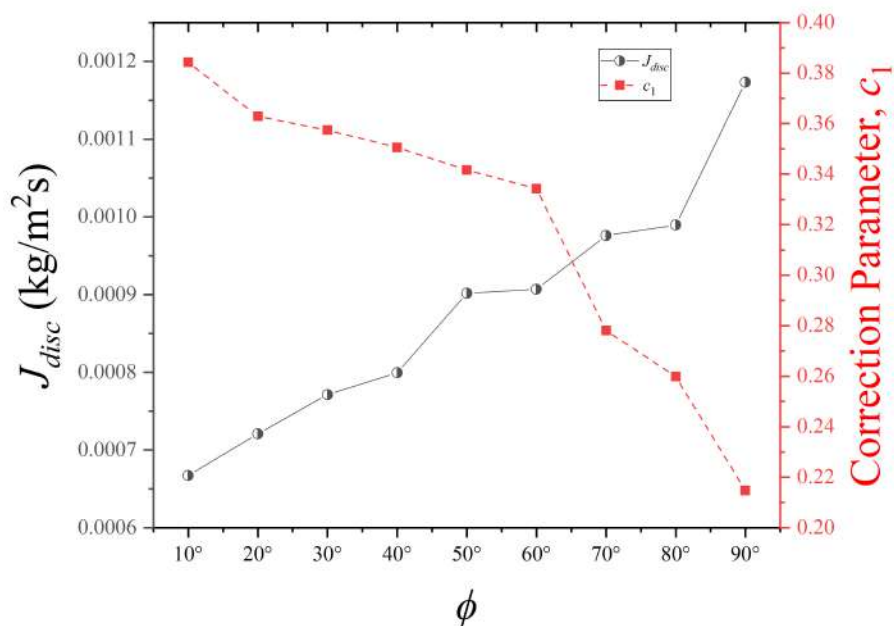

**Fig. S8** Variation of the evaporative flux  $J_{disc}$  and correction parameter  $c_1$  with angle of inclination for a  $5 \mu\text{L}$  drop with an initial particle concentration of 0.05 %

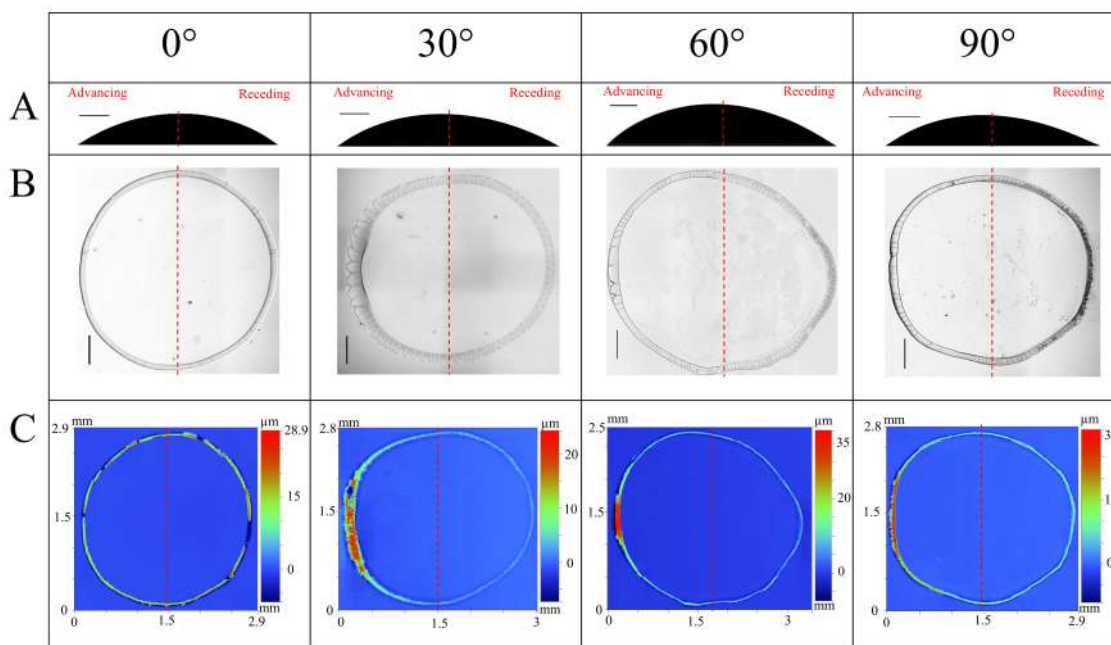

**Fig. S9** (A) The side view at  $t/t_f=0$  (scale bar=  $250 \mu\text{m}$ ), (B) Microscope image of the final dried deposits at  $t/t_f=1$  (scale bar =  $250 \mu\text{m}$ ), and (C) Optical surface profiles of the dried deposits after the completion of drying, at  $\phi= 0^\circ, 30^\circ, 60^\circ$  and  $90^\circ$  for a  $2 \mu\text{L}$  drop with an initial particle concentration of 0.5%

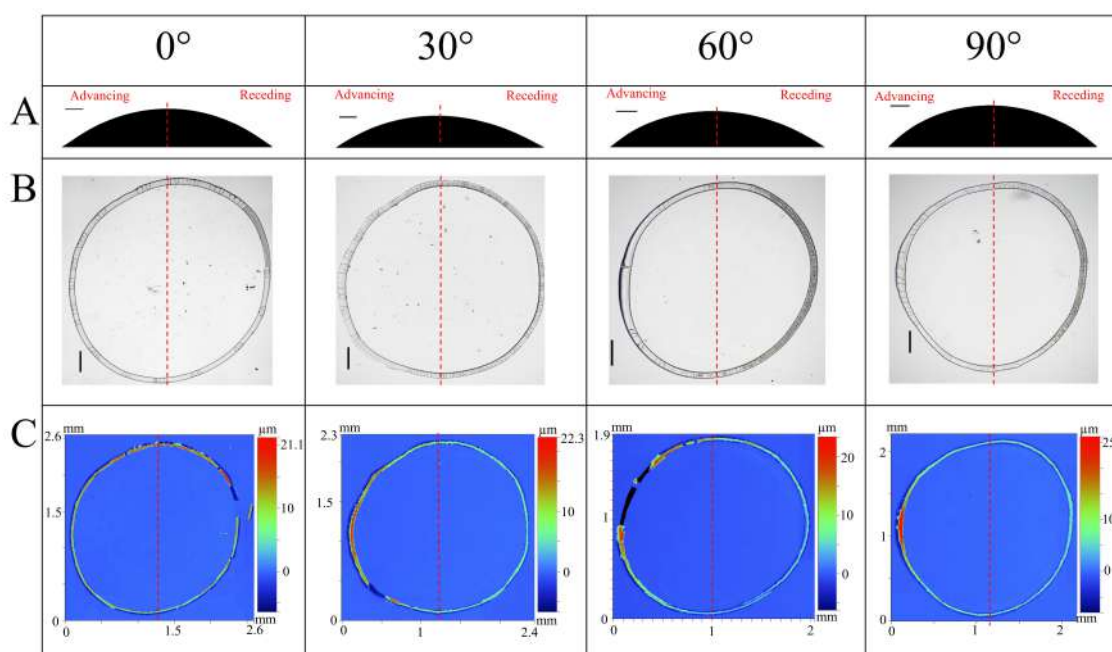

**Fig. S10** (A) The side view at  $t/t_f=0$  (scale bar=  $200\ \mu\text{m}$ ), (B) Microscope image of the final dried deposits at  $t/t_f=1$  (scale bar =  $200\ \mu\text{m}$ ), and (C) Optical surface profiles of the dried deposits after the completion of drying, at  $\phi=0^\circ, 30^\circ, 60^\circ$  and  $90^\circ$  for a  $1\ \mu\text{L}$  drop with an initial particle concentration of 0.5%
